# Supplementary material for: Identification of Allergens in White- and Red-Fleshed Pitaya (Selenicereus undatus and Selenicereus costaricensis) Seeds Using Bottom-Up Proteomics Coupled with Immunoinformatics
Source: MDPI journal article supplement (doi:10.3390/nu14091962), 2022-05-07
Supplement: s1 [file s1]

## Supplementary Materials

# Identification of Allergens in White- and Red-Fleshed Pitaya (*Selenicereus undatus* and *Selenicereus costaricensis*) Seeds Using Bottom-Up Proteomics Coupled with Immunoinformatics

Mengzhen Hao, XIJIRI, Ziyi Zhao and Huilian Che \*

College of Food Science and Nutritional Engineering, China Agriculture University, Beijing 100083, China; mengzhen.hao@cau.edu.cn (M.H.); xijir0304@163.com (XIJIRI); ziyiiz@163.com (Z.Z.)

\* Correspondence: chehuilian@cau.edu.cn

## Table of contents

- **Table S1** Information of pitaya allergic patients.
- **Table S2** Information of primers for RT-PCR.
- **Table S3** Full list of the total protein from white-fleshed pitaya seeds protein band hits retrieved with MASCOT discoverer software screening.
- **Table S4** Full list of the total protein from red-fleshed pitaya seeds protein band hits retrieved with MASCOT discoverer software screening.
- **Table S5** Details for top 10% proteins identified via LC–MS/MS from white-fleshed pitaya seeds allergenicity predicted by three online platforms (Allermatchtm, Algpred 2.0, and AllerCatPro).
- **Table S6** Details for top 10% proteins identified via LC–MS/MS from red-fleshed pitaya seeds allergenicity predicted by three online platforms (Allermatchtm, Algpred 2.0, and AllerCatPro).
- **Table S7** CDSs for potential allergens in white- and red-fleshed pitaya seeds.
- **Supplement information S8: The distribution of identified peptides in the top 10% of protein identified via LC–MS/MS in excised gel spot from white-fleshed pitaya seeds.**
- **Supplement information S9: The distribution of identified peptides in the top 10% of protein identified via LC–MS/MS in excised gel spot from red-fleshed pitaya seeds.**

**Table S1.** Information of pitaya allergic patients.

| Patient number | Age (years old) | Self-reporting symptoms                           | Symptoms occurring after eating white-fleshed or/and red-fleshed pitaya | Others                                         |
|----------------|-----------------|---------------------------------------------------|-------------------------------------------------------------------------|------------------------------------------------|
| P1             | 23              | Vomiting, diarrhea, and abdominal pain            | White-fleshed pitaya                                                    | Relieved after oral loratadine administration. |
| P2             | 23              | Vomiting and diarrhea                             | White-fleshed and red-fleshed pitaya                                    |                                                |
| P3             | 6               | Wind mass rash, abdominal pain, and watery stools | Red-fleshed pitaya                                                      |                                                |
| P4             | 33              | Swelling of the right eyelid                      | Red-fleshed pitaya                                                      |                                                |
| P5             | 14              | Urticaria                                         | White-fleshed and red-fleshed pitaya                                    |                                                |

**Table S2.** Information of primers for RT-PCR.

| Primers                    | Sequences (5'-3')         |
|----------------------------|---------------------------|
| <i>Cupin1</i> (Forward)    | ATGATGGCACCCCATTTGAATC    |
| <i>Cupin1</i> (Reverse)    | TCACTCAAACCCCATGACCATT    |
| <i>Hsp70</i> (Forward)     | TTAATCAACCTCCTCAATCTTGGGA |
| <i>Hsp70</i> (Reverse)     | AAAGGTGAAGGTCCGGCG        |
| <i>Hsp sti 1</i> (Forward) | CATCTGACTTGGACAATGCC      |
| <i>Hsp sti 1</i> (Reverse) | ATGGCCGACGAAGCCAA         |

**Table S3.** Full list of the total protein from white-fleshed pitaya seeds protein band hits retrieved with MASCOT discoverer software screening.

| N. | Description                                                                                                       | Accession  | Score | Mass (Da) | Peptides (Unique) | Coverage (%) |
|----|-------------------------------------------------------------------------------------------------------------------|------------|-------|-----------|-------------------|--------------|
| 1  | Uncharacterized protein (Fragment) OS=Beta vulgaris subsp. vulgaris OX=3555 GN=BVRB_027930 PE=3 SV=1              | A0A0J8DSR1 | 158   | 26488     | 6(6)              | 24.1         |
| 2  | Cupin type-1 domain-containing protein OS=Opuntia streptacantha OX=393608 PE=4 SV=1                               | A0A7C8ZNT3 | 143   | 18045     | 2(1)              | 12.7         |
| 3  | Uncharacterized protein OS=Spinacia oleracea OX=3562 GN=SOVF_029540 PE=4 SV=1                                     | A0A0K9RTZ6 | 137   | 65882     | 2(1)              | 4.7          |
| 4  | Uncharacterized protein OS=Chenopodium quinoa OX=63459 PE=4 SV=1                                                  | A0A803LTG6 | 132   | 19434     | 4(4)              | 27.5         |
| 5  | Heat shock protein 70 OS=Spinacia oleracea OX=3562 GN=HSP70-13 PE=2 SV=1                                          | A0A1I9TK81 | 106   | 71808     | 3(3)              | 6.1          |
| 6  | Proteasome subunit beta (Fragment) OS=Spinacia oleracea OX=3562 GN=SOVF_007620 PE=3 SV=1                          | A0A0K9S2G1 | 83    | 29745     | 1(1)              | 5.5          |
| 7  | Histone H4 OS=Beta vulgaris subsp. vulgaris OX=3555 GN=BVRB_5g125910 PE=3 SV=1                                    | A0A0J8BUP3 | 80    | 11402     | 1(1)              | 11.7         |
| 8  | Formamidase OS=Opuntia streptacantha OX=393608 PE=4 SV=1                                                          | A0A7C9EWT0 | 77    | 52325     | 2(2)              | 6.1          |
| 9  | VWFA domain-containing protein OS=Spinacia oleracea OX=3562 GN=SOVF_154600 PE=3 SV=1                              | A0A0K9QPX4 | 72    | 42327     | 1(1)              | 4.3          |
| 10 | Uncharacterized protein OS=Opuntia streptacantha OX=393608 PE=4 SV=1                                              | A0A7C8YYM2 | 66    | 16165     | 1(1)              | 4.8          |
| 11 | PLAT domain-containing protein OS=Opuntia streptacantha OX=393608 PE=4 SV=1                                       | A0A7C9CMR0 | 65    | 19550     | 1(1)              | 5.4          |
| 12 | Proteasome subunit beta OS=Nepenthes alata OX=4376 GN=NaPSB1-1 PE=2 SV=1                                          | A0A286T1W3 | 64    | 29511     | 2(2)              | 8.1          |
| 13 | Tr-type G domain-containing protein OS=Beta vulgaris subsp. vulgaris OX=3555 GN=BVRB_2g046240 PE=3 SV=1           | A0A0J8BGW2 | 60    | 94791     | 1(1)              | 1.4          |
| 14 | ATP synthase subunit alpha OS=Beta vulgaris subsp. vulgaris OX=3555 GN=atpA PE=3 SV=1                             | A0A023ZQ87 | 58    | 55584     | 1(1)              | 2.6          |
| 15 | Proteasome subunit beta OS=Opuntia streptacantha OX=393608 PE=3 SV=1                                              | A0A7C9D7H1 | 56    | 22828     | 2(2)              | 10.2         |
| 16 | Uncharacterized protein (Fragment) OS=Opuntia streptacantha OX=393608 PE=4 SV=1                                   | A0A7C8YRL3 | 56    | 15770     | 2(2)              | 17.1         |
| 17 | Uncharacterized protein OS=Beta vulgaris subsp. vulgaris OX=3555 GN=BVRB_9g209070 PE=3 SV=1                       | A0A0J8BPT8 | 49    | 24249     | 1(1)              | 4.5          |
| 18 | D-xylose 1-dehydrogenase (NADP(+)) (Fragment) OS=Opuntia streptacantha OX=393608 PE=4 SV=1                        | A0A7C9AF84 | 48    | 42687     | 1(1)              | 2.6          |
| 19 | Elongation factor Tu (Fragment) OS=Beta vulgaris subsp. vulgaris OX=3555 GN=BVRB_018790 PE=3 SV=1                 | A0A0J7YLM1 | 46    | 44450     | 2(2)              | 6.4          |
| 20 | Dihydrolipoyllysine-residue succinyltransferase OS=Beta vulgaris subsp. vulgaris OX=3555 GN=BVRB_009840 PE=3 SV=1 | A0A0J8B2D3 | 45    | 51446     | 1(1)              | 1.7          |
| 21 | Ferritin OS=Beta vulgaris subsp. vulgaris OX=3555 GN=BVRB_2g044700 PE=3 SV=1                                      | A0A0J8BHE5 | 45    | 29868     | 1(1)              | 3.4          |
| 22 | Peroxidase OS=Tamarix hispida OX=189793 GN=POD2 PE=2 SV=1                                                         | C0KKH7     | 44    | 36304     | 1(1)              | 1.8          |

Continued Table S3

| N. | Description                                                                                                | Accession                      | Score | Mass (Da) | Peptides (Unique) | Coverage (%) |
|----|------------------------------------------------------------------------------------------------------------|--------------------------------|-------|-----------|-------------------|--------------|
| 23 | Elongation factor 1-alpha OS=Hylocereus polyrhizus OX=1195597 GN=EF1A PE=2 SV=1                            | A0A249Y703                     | 43    | 50180     | 1(1)              | 2.6          |
| 24 | Uncharacterized protein (Fragment) OS=Opuntia streptacantha OX=393608 PE=4 SV=1                            | A0A7C9CHR1                     | 43    | 23990     | 1(1)              | 5.3          |
| 25 | Formylglycinamide ribonucleotide amidotransferase OS=Spinacia oleracea OX=3562 GN=SOVF_185900 PE=3 SV=1    | A0A0K9QF72                     | 40    | 149942    | 1(1)              | 0.7          |
| 26 | Uncharacterized protein (Fragment) OS=Opuntia streptacantha OX=393608 PE=4 SV=1                            | A0A7C9ERX8                     | 40    | 13642     | 1(1)              | 9.8          |
| 27 | Uncharacterized protein OS=Chenopodium quinoa OX=63459 PE=4 SV=1                                           | A0A803KW96                     | 39    | 65071     | 1(1)              | 2.1          |
| 28 | Uncharacterized protein OS=Spinacia oleracea OX=3562 GN=SOVF_024240 PE=3 SV=1                              | A0A0K9RVF6                     | 39    | 36236     | 1(1)              | 3.8          |
| 29 | Histone H2A OS=Beta vulgaris subsp. vulgaris OX=3555 GN=BVRB_015930 PE=3 SV=1                              | A0A0J8B158                     | 38    | 15362     | 1(1)              | 6.2          |
| 30 | Uncharacterized protein OS=Chenopodium quinoa OX=63459 PE=4 SV=1                                           | A0A803LCC3                     | 38    | 99945     | 1(1)              | 0.9          |
| 31 | Annexin (Fragment) OS=Opuntia streptacantha OX=393608 PE=3 SV=1                                            | A0A7C8Z5P5                     | 37    | 36019     | 1(1)              | 2.8          |
| 32 | Lactoylglutathione lyase OS=Opuntia streptacantha OX=393608 PE=3 SV=1                                      | A0A7C9ED66                     | 37    | 42702     | 1(1)              | 1.5          |
| 33 | Uncharacterized protein OS=Chenopodium quinoa OX=63459 PE=4 SV=1                                           | A0A803KPQ9                     | 37    | 114105    | 1(1)              | 0.8          |
| 34 | Uncharacterized protein OS=Chenopodium quinoa OX=63459 PE=4 SV=1                                           | A0A803MK43                     | 36    | 18155     | 1(1)              | 6.4          |
| 35 | Uncharacterized protein OS=Spinacia oleracea OX=3562 GN=SOVF_117760 PE=4 SV=1                              | A0A0K9R339                     | 36    | 101275    | 1(1)              | 0.7          |
| 36 | Uncharacterized protein OS=Spinacia oleracea OX=3562 GN=SOVF_082480 PE=3 SV=1                              | A0A0K9RCF0                     | 35    | 20634     | 1(1)              | 5.1          |
| 37 | Ribulose biphosphate carboxylase large chain (Fragment) OS=Persicaria punctata OX=137688 GN=rbcL PE=3 SV=1 | A6YSW9                         | 35    | 49327     | 1(1)              | 1.6          |
| 38 | PPM-type phosphatase domain-containing protein OS=Spinacia oleracea OX=3562 GN=SOVF_154270 PE=4 SV=1       | A0A0K9QRN3                     | 34    | 52513     | 1(1)              | 3            |
| 39 | Tubulin beta chain OS=Spinacia oleracea OX=3562 GN=SOVF_174120 PE=3 SV=1                                   | A0A0K9QIW0                     | 33    | 50836     | 1(1)              | 2.7          |
| 40 | Uncharacterized protein OS=Spinacia oleracea OX=3562 GN=SOVF_047510 PE=3 SV=1                              | A0A0K9RPW9                     | 33    | 35719     | 1(1)              | 3.1          |
| 41 | Uncharacterized protein (Fragment) OS=Opuntia streptacantha OX=393608 PE=4 SV=1                            | A0A7C8ZTY5                     | 33    | 12066     | 1(1)              | 5.7          |
| 42 | Uncharacterized protein OS=Chenopodium quinoa OX=63459 PE=4 SV=1                                           | A0A803KP77                     | 33    | 29582     | 1(1)              | 4.2          |
| 43 | Uncharacterized protein OS=Chenopodium quinoa OX=63459 PE=4 SV=1                                           | tr A0A803KM81 A0A803KM81_CHEQI | 33    | 132058    | 1(1)              | 0.6          |
| 44 | Uncharacterized protein OS=Chenopodium quinoa OX=63459 PE=4 SV=1                                           | tr A0A803LHI7 A0A803LHI7_CHEQI | 33    | 84614     | 1(1)              | 2.5          |

Continued Table S3

| N. | Description                                                                                                    | Accession                          | Score | Mass (Da) | Peptides (Unique) | Coverage (%) |
|----|----------------------------------------------------------------------------------------------------------------|------------------------------------|-------|-----------|-------------------|--------------|
| 45 | Uncharacterized protein (Fragment) OS=Opuntia streptacantha OX=393608 PE=3 SV=1                                | tr A0A7C8ZY03 A0A7C8ZY03_OPUST     | 33    | 15483     | 1(1)              | 6.3          |
| 46 | Proteasome subunit beta OS=Opuntia streptacantha OX=393608 PE=3 SV=1                                           | tr A0A7C9DYH2 A0A7C9DYH2_OPUS<br>T | 33    | 29808     | 1(1)              | 3.3          |
| 47 | Uncharacterized protein (Fragment) OS=Opuntia streptacantha OX=393608 PE=4 SV=1                                | tr A0A7C8ZN49 A0A7C8ZN49_OPUST     | 32    | 24996     | 1(1)              | 4.6          |
| 48 | Uncharacterized protein (Fragment) OS=Opuntia streptacantha OX=393608 PE=4 SV=1                                | tr A0A7C9EA90 A0A7C9EA90_OPUST     | 32    | 10670     | 1(1)              | 6            |
| 49 | RING-type E3 ubiquitin transferase OS=Opuntia streptacantha OX=393608 PE=4 SV=1                                | tr A0A7C8YUS2 A0A7C8YUS2_OPUST     | 31    | 34317     | 1(1)              | 2.4          |
| 50 | Uncharacterized protein OS=Spinacia oleracea OX=3562 GN=SOVF_021510 PE=4 SV=1                                  | tr A0A0K9RW14 A0A0K9RW14_SPIOL     | 31    | 24723     | 1(1)              | 5.2          |
| 51 | Importin N-terminal domain-containing protein OS=Spinacia oleracea OX=3562 GN=SOVF_181840 PE=4 SV=1            | tr A0A0K9QGJ6 A0A0K9QGJ6_SPIOL     | 28    | 105505    | 1(1)              | 0.8          |
| 52 | DUF4216 domain-containing protein (Fragment) OS=Beta vulgaris subsp. vulgaris OX=3555 GN=BVRB_016490 PE=4 SV=1 | tr A0A0J8B0Y1 A0A0J8B0Y1_BETVV     | 23    | 57613     | 1(1)              | 1            |
| 53 | Uncharacterized protein (Fragment) OS=Opuntia streptacantha OX=393608 PE=4 SV=1                                | tr A0A7C9D384 A0A7C9D384_OPUST     | 19    | 28239     | 1(1)              | 2.5          |

**Table S4.** Full list of the total protein from red-fleshed pitaya seeds protein band hits retrieved with MASCOT discoverer software screening.

| N. | Description                                                                                                       | Accession  | Score | Mass (Da) | Peptides (Unique) | Coverage (%) |
|----|-------------------------------------------------------------------------------------------------------------------|------------|-------|-----------|-------------------|--------------|
| 1  | Proteasome subunit beta (Fragment) OS=Spinacia oleracea OX=3562 GN=SOVF_007620 PE=3 SV=1                          | A0A0K9S2G1 | 315   | 29745     | 4(1)              | 20.4         |
| 2  | Uncharacterized protein (Fragment) OS=Opuntia streptacantha OX=393608 PE=4 SV=1                                   | A0A7C8YRP5 | 283   | 15393     | 4(1)              | 37.8         |
| 3  | Cupin type-1 domain-containing protein OS=Opuntia streptacantha OX=393608 PE=4 SV=1                               | A0A7C8ZNT3 | 274   | 18045     | 2(1)              | 12.7         |
| 4  | Uncharacterized protein OS=Opuntia streptacantha OX=393608 PE=4 SV=1                                              | A0A7C9B091 | 248   | 64965     | 5(5)              | 11           |
| 5  | Heat shock protein 70 OS=Spinacia oleracea OX=3562 GN=HSP70-13 PE=2 SV=1                                          | A0A1I9TK81 | 230   | 71808     | 6(6)              | 11           |
| 6  | Actin 11 OS=Sesuvium portulacastrum OX=221166 PE=2 SV=1                                                           | A0A1L5JKA9 | 206   | 41929     | 6(4)              | 19.2         |
| 7  | Ribosomal_L18e/L15P domain-containing protein OS=Beta vulgaris subsp. vulgaris OX=3555 GN=BVRB_4g076000 PE=3 SV=1 | A0A0J8FEI6 | 182   | 20923     | 4(4)              | 26.2         |
| 8  | Formamidase OS=Opuntia streptacantha OX=393608 PE=4 SV=1                                                          | A0A7C9EWT0 | 182   | 52325     | 3(3)              | 8.7          |
| 9  | Uncharacterized protein OS=Spinacia oleracea OX=3562 GN=SOVF_029540 PE=4 SV=1                                     | A0A0K9RTZ6 | 179   | 65882     | 2(1)              | 4.7          |
| 10 | Uncharacterized protein (Fragment) OS=Opuntia streptacantha OX=393608 PE=4 SV=1                                   | A0A7C8YRL3 | 170   | 15770     | 4(3)              | 34.2         |
| 11 | Proteasome subunit beta OS=Opuntia streptacantha OX=393608 PE=3 SV=1                                              | A0A7C9D7H1 | 164   | 22828     | 4(4)              | 15.6         |
| 12 | Cupin_5 domain-containing protein OS=Opuntia streptacantha OX=393608 PE=4 SV=1                                    | A0A7C9CU14 | 156   | 22754     | 1(1)              | 6.5          |
| 13 | Uncharacterized protein OS=Opuntia streptacantha OX=393608 PE=3 SV=1                                              | A0A7C8ZZS4 | 146   | 22123     | 4(1)              | 28           |
| 14 | GTP-binding nuclear protein OS=Spinacia oleracea OX=3562 GN=SOVF_098770 PE=3 SV=1                                 | A0A0K9R796 | 131   | 25564     | 4(3)              | 20.8         |
| 15 | Uncharacterized protein OS=Chenopodium quinoa OX=63459 PE=4 SV=1                                                  | A0A803LTG6 | 129   | 19434     | 3(0)              | 19.9         |
| 16 | Thioredoxin-dependent peroxiredoxin OS=Tamarix hispida OX=189793 GN=Prx2 PE=2 SV=1                                | I0CC94     | 123   | 30019     | 2(1)              | 10.9         |
| 17 | Uncharacterized protein OS=Opuntia streptacantha OX=393608 PE=3 SV=1                                              | A0A7C8Z5R6 | 122   | 22142     | 4(1)              | 22.8         |
| 18 | Proteasome subunit beta OS=Nepenthes alata OX=4376 GN=NaPSB1-1 PE=2 SV=1                                          | A0A286T1W3 | 121   | 29511     | 3(3)              | 11.7         |
| 19 | Uncharacterized protein OS=Chenopodium quinoa OX=63459 PE=4 SV=1                                                  | A0A803LZK8 | 118   | 22897     | 2(0)              | 15.4         |
| 20 | Uncharacterized protein OS=Chenopodium quinoa OX=63459 PE=4 SV=1                                                  | A0A803N503 | 114   | 27087     | 2(2)              | 10.1         |
| 21 | Uncharacterized protein OS=Opuntia streptacantha OX=393608 PE=3 SV=1                                              | A0A7C9DX00 | 110   | 17182     | 3(3)              | 13           |
| 22 | Thioredoxin-dependent peroxiredoxin OS=Salicornia europaea OX=206448 PE=2 SV=1                                    | A0A1D8H339 | 107   | 30203     | 2(1)              | 12           |
| 23 | Uncharacterized protein OS=Opuntia streptacantha OX=393608 PE=3 SV=1                                              | A0A7C9AUE0 | 105   | 16087     | 4(1)              | 37           |

Continued Table S4

| N. | Description                                                                                                       | Accession  | Score | Mass (Da) | Peptides (Unique) | Coverage (%) |
|----|-------------------------------------------------------------------------------------------------------------------|------------|-------|-----------|-------------------|--------------|
| 24 | Uncharacterized protein OS=Opuntia streptacantha OX=393608 PE=4 SV=1                                              | A0A7C8YYM2 | 105   | 16165     | 1(1)              | 4.8          |
| 25 | Ribosomal_L18e/L15P domain-containing protein (Fragment) OS=Opuntia streptacantha OX=393608 PE=3 SV=1             | A0A7C9CUT8 | 105   | 13740     | 2(1)              | 18.9         |
| 26 | Uncharacterized protein OS=Opuntia streptacantha OX=393608 PE=4 SV=1                                              | A0A7C9D682 | 96    | 24843     | 3(3)              | 17.9         |
| 27 | Malate dehydrogenase OS=Spinacia oleracea OX=3562 GN=SOVF_175150 PE=3 SV=1                                        | A0A0K9QKH5 | 93    | 36274     | 1(1)              | 4.7          |
| 28 | S4 RNA-binding domain-containing protein OS=Spinacia oleracea OX=3562 GN=SOVF_105660 PE=3 SV=1                    | A0A0K9R566 | 92    | 23031     | 4(4)              | 21.3         |
| 29 | GlutaminyI-tRNA synthetase OS=Opuntia streptacantha OX=393608 PE=3 SV=1                                           | A0A7C8YIH5 | 89    | 91277     | 1(1)              | 1.6          |
| 30 | Allene-oxide cyclase OS=Opuntia streptacantha OX=393608 PE=3 SV=1                                                 | A0A7C9EZI9 | 88    | 30285     | 3(3)              | 9.7          |
| 31 | Uncharacterized protein OS=Opuntia streptacantha OX=393608 PE=4 SV=1                                              | A0A7C9DW78 | 87    | 46521     | 1(1)              | 3.1          |
| 32 | Peptidyl-prolyl cis-trans isomerase OS=Opuntia streptacantha OX=393608 PE=3 SV=1                                  | A0A7C9DT77 | 87    | 25462     | 2(2)              | 10.3         |
| 33 | Uncharacterized protein OS=Chenopodium quinoa OX=63459 PE=4 SV=1                                                  | A0A803MK43 | 86    | 18155     | 2(2)              | 6.4          |
| 34 | Uncharacterized protein (Fragment) OS=Opuntia streptacantha OX=393608 PE=4 SV=1                                   | A0A7C9ERX8 | 83    | 13642     | 2(2)              | 9.8          |
| 35 | ATP synthase subunit alpha OS=Nepenthes ventricosa x Nepenthes alata OX=1744888 GN=atp1 PE=3 SV=1                 | A0A385Y4B7 | 77    | 55587     | 2(1)              | 4.3          |
| 36 | SKP1-like protein OS=Spinacia oleracea OX=3562 GN=SOVF_115630 PE=3 SV=1                                           | A0A0K9R207 | 77    | 18890     | 1(1)              | 7.2          |
| 37 | UBX domain-containing protein OS=Opuntia streptacantha OX=393608 PE=4 SV=1                                        | A0A7C9DHV8 | 76    | 50446     | 1(1)              | 3.1          |
| 38 | Glyceraldehyde-3-phosphate dehydrogenase OS=Spinacia oleracea OX=3562 GN=SOVF_178150 PE=3 SV=1                    | A0A0K9QJL6 | 75    | 45322     | 1(1)              | 3.3          |
| 39 | CN hydrolase domain-containing protein OS=Spinacia oleracea OX=3562 GN=SOVF_119350 PE=3 SV=1                      | A0A0K9R0Y0 | 74    | 37735     | 1(1)              | 4.3          |
| 40 | Ribosomal_L16 domain-containing protein OS=Spinacia oleracea OX=3562 GN=SOVF_064690 PE=3 SV=1                     | A0A0K9R893 | 73    | 25709     | 1(1)              | 5.4          |
| 41 | Ribosomal_L18e/L15P domain-containing protein OS=Beta vulgaris subsp. vulgaris OX=3555 GN=BVRB_6g141790 PE=3 SV=1 | A0A0J8C427 | 72    | 29125     | 1(1)              | 4.1          |
| 42 | MPN domain-containing protein (Fragment) OS=Opuntia streptacantha OX=393608 PE=3 SV=1                             | A0A7C9DSA4 | 72    | 34950     | 2(2)              | 7.4          |
| 43 | Uncharacterized protein OS=Opuntia streptacantha OX=393608 PE=4 SV=1                                              | A0A7C8Z9Z6 | 71    | 19831     | 1(1)              | 7.8          |
| 44 | Uncharacterized protein OS=Spinacia oleracea OX=3562 GN=SOVF_074710 PE=4 SV=1                                     | A0A0K9REU3 | 70    | 38307     | 2(2)              | 6.3          |
| 45 | Uncharacterized protein OS=Spinacia oleracea OX=3562 GN=SOVF_028400 PE=3 SV=1                                     | A0A0K9RU85 | 69    | 23734     | 1(1)              | 6.3          |
| 46 | Superoxide dismutase OS=Opuntia streptacantha OX=393608 PE=3 SV=1                                                 | A0A7C8ZWU0 | 67    | 26282     | 3(3)              | 11.4         |



Continued Table S4

| N. | Description                                                                                                | Accession  | Score | Mass (Da) | Peptides (Unique) | Coverage (%) |
|----|------------------------------------------------------------------------------------------------------------|------------|-------|-----------|-------------------|--------------|
| 47 | Reticulon-like protein OS=Opuntia streptacantha OX=393608 PE=4 SV=1                                        | A0A7C8ZF07 | 66    | 33220     | 2(2)              | 7.8          |
| 48 | ATP synthase subunit alpha OS=Beta vulgaris subsp. vulgaris OX=3555 GN=atpA PE=3 SV=1                      | A0A023ZQ87 | 66    | 55584     | 1(1)              | 2.6          |
| 49 | Uncharacterized protein OS=Chenopodium quinoa OX=63459 PE=4 SV=1                                           | A0A803MYN6 | 65    | 17869     | 1(1)              | 8.9          |
| 50 | Poly [ADP-ribose] polymerase (Fragment) OS=Spinacia oleracea OX=3562 GN=SOVF_124230 PE=4 SV=1              | A0A0K9QZG2 | 65    | 92270     | 1(1)              | 1.6          |
| 51 | Ubiquitin OS=Beta vulgaris subsp. vulgaris OX=3555 GN=BVRB_000430 PE=3 SV=1                                | A0A0J8B525 | 64    | 14906     | 1(1)              | 7            |
| 52 | Acetohydroxy-acid reductoisomerase OS=Opuntia streptacantha OX=393608 PE=3 SV=1                            | A0A7C9ANA7 | 64    | 66498     | 1(1)              | 3            |
| 53 | Uncharacterized protein OS=Spinacia oleracea OX=3562 GN=SOVF_102400 PE=3 SV=1                              | A0A0K9R865 | 64    | 60455     | 1(1)              | 2.6          |
| 54 | Uncharacterized protein OS=Beta vulgaris subsp. vulgaris OX=3555 GN=BVRB_9g209070 PE=3 SV=1                | A0A0J8BPT8 | 63    | 24249     | 2(2)              | 4.5          |
| 55 | CSD domain-containing protein (Fragment) OS=Opuntia streptacantha OX=393608 PE=4 SV=1                      | A0A7C8ZG77 | 63    | 10757     | 1(1)              | 15.8         |
| 56 | Uncharacterized protein OS=Beta vulgaris subsp. vulgaris OX=3555 GN=BVRB_005380 PE=3 SV=1                  | A0A0J8B417 | 62    | 44407     | 1(1)              | 3.2          |
| 57 | Annexin OS=Spinacia oleracea OX=3562 GN=SOVF_164450 PE=3 SV=1                                              | A0A0K9QNT1 | 62    | 36187     | 1(1)              | 3.5          |
| 58 | Uncharacterized protein OS=Beta vulgaris subsp. vulgaris OX=3555 GN=BVRB_6g145160 PE=4 SV=1                | A0A0J8C319 | 61    | 22671     | 1(1)              | 5.5          |
| 59 | Ribosomal_S7 domain-containing protein OS=Beta vulgaris subsp. vulgaris OX=3555 GN=BVRB_3g050700 PE=3 SV=1 | A0A0J8CS67 | 59    | 23395     | 2(2)              | 10.4         |
| 60 | Adenosinetriphosphatase OS=Opuntia streptacantha OX=393608 PE=3 SV=1                                       | A0A7C9CQ50 | 59    | 58332     | 2(2)              | 3.3          |
| 61 | Elongation factor Tu OS=Opuntia streptacantha OX=393608 PE=3 SV=1                                          | A0A7C9CTD2 | 58    | 53499     | 1(1)              | 2.3          |
| 62 | 14_3_3 domain-containing protein OS=Spinacia oleracea OX=3562 GN=SOVF_097310 PE=3 SV=1                     | A0A0K9R7S3 | 57    | 29569     | 1(1)              | 4.6          |
| 63 | Uncharacterized protein OS=Chenopodium quinoa OX=63459 PE=4 SV=1                                           | A0A803L2U0 | 56    | 29434     | 2(2)              | 8.8          |
| 64 | Uncharacterized protein OS=Spinacia oleracea OX=3562 GN=SOVF_128330 PE=3 SV=1                              | A0A0K9QY28 | 55    | 42025     | 1(1)              | 2.6          |
| 65 | 40S ribosomal protein S4 OS=Beta vulgaris subsp. vulgaris OX=3555 GN=BVRB_004870 PE=3 SV=1                 | A0A0J8B7M5 | 54    | 29968     | 1(1)              | 4.2          |
| 66 | Isocitrate lyase OS=Spinacia oleracea OX=3562 GN=SOVF_042350 PE=3 SV=1                                     | A0A0K9RPI6 | 54    | 63996     | 3(3)              | 3.2          |
| 67 | Malate synthase OS=Spinacia oleracea OX=3562 GN=SOVF_184210 PE=3 SV=1                                      | A0A0K9QFS2 | 54    | 64615     | 1(1)              | 2.1          |
| 68 | Uncharacterized protein OS=Chenopodium quinoa OX=63459 PE=4 SV=1                                           | A0A803MNI3 | 54    | 18408     | 1(1)              | 4.8          |
| 69 | Pyruvate kinase OS=Opuntia streptacantha OX=393608 PE=4 SV=1                                               | A0A7C8Z1C6 | 54    | 21590     | 1(1)              | 7.6          |

Continued Table S4

| N. | Description                                                                                            | Accession  | Score | Mass (Da) | Peptides (Unique) | Coverage (%) |
|----|--------------------------------------------------------------------------------------------------------|------------|-------|-----------|-------------------|--------------|
| 70 | Uncharacterized protein (Fragment) OS=Opuntia streptacantha OX=393608 PE=4 SV=1                        | A0A7C8YQ02 | 53    | 18764     | 1(1)              | 8            |
| 71 | Ribosomal_S17_N domain-containing protein OS=Spinacia oleracea OX=3562 GN=SOVF_049780 PE=3 SV=1        | A0A0K9RPC5 | 53    | 17977     | 1(1)              | 6.9          |
| 72 | Aryl-alcohol dehydrogenase (NADP(+)) OS=Opuntia streptacantha OX=393608 PE=3 SV=1                      | A0A7C8ZSD4 | 51    | 36894     | 2(2)              | 6.4          |
| 73 | KH type-2 domain-containing protein OS=Beta vulgaris subsp. vulgaris OX=3555 GN=BVRB_010820 PE=3 SV=1  | A0A0J8B2L2 | 51    | 27002     | 1(1)              | 5.4          |
| 74 | Elongation factor Tu (Fragment) OS=Beta vulgaris subsp. vulgaris OX=3555 GN=BVRB_018790 PE=3 SV=1      | A0A0J7YLM1 | 51    | 44450     | 1(1)              | 4.7          |
| 75 | SBP-type domain-containing protein OS=Beta vulgaris subsp. vulgaris OX=3555 GN=BVRB_3g059840 PE=4 SV=1 | A0A0J8CTR7 | 50    | 111979    | 1(1)              | 0.6          |
| 76 | D-3-phosphoglycerate dehydrogenase OS=Opuntia streptacantha OX=393608 PE=3 SV=1                        | A0A7C9ER97 | 50    | 65170     | 1(1)              | 2.6          |
| 77 | GOLD domain-containing protein OS=Spinacia oleracea OX=3562 GN=SOVF_044590 PE=3 SV=1                   | A0A0K9RP25 | 50    | 24852     | 1(1)              | 5.1          |
| 78 | Elongation factor 1-alpha OS=Hylocereus polyrhizus OX=1195597 GN=EF1A PE=2 SV=1                        | A0A249Y703 | 49    | 50180     | 2(1)              | 5            |
| 79 | Uncharacterized protein OS=Opuntia streptacantha OX=393608 PE=4 SV=1                                   | A0A7C9CR18 | 49    | 48442     | 2(2)              | 4.7          |
| 80 | D-xylose 1-dehydrogenase (NADP(+)) (Fragment) OS=Opuntia streptacantha OX=393608 PE=4 SV=1             | A0A7C9AF84 | 48    | 42687     | 1(1)              | 2.6          |
| 81 | Glyceraldehyde-3-phosphate dehydrogenase OS=Hylocereus polyrhizus OX=1195597 GN=G3P PE=2 SV=1          | A0A249Y796 | 48    | 36839     | 2(2)              | 6.8          |
| 82 | Uncharacterized protein OS=Spinacia oleracea OX=3562 GN=SOVF_021510 PE=4 SV=1                          | A0A0K9RW14 | 47    | 24723     | 1(1)              | 5.2          |
| 83 | Ribos_L4_asso_C domain-containing protein OS=Spinacia oleracea OX=3562 GN=SOVF_207050 PE=3 SV=1        | A0A0K9Q8R4 | 47    | 35669     | 1(1)              | 4            |
| 84 | Uncharacterized protein OS=Opuntia streptacantha OX=393608 PE=3 SV=1                                   | A0A7C9DCD2 | 47    | 13894     | 1(1)              | 6.7          |
| 85 | PsbP domain-containing protein OS=Opuntia streptacantha OX=393608 PE=4 SV=1                            | A0A7C9D4B5 | 47    | 28412     | 1(1)              | 6.8          |
| 86 | Uncharacterized protein OS=Spinacia oleracea OX=3562 GN=SOVF_123500 PE=3 SV=1                          | A0A0K9QZL7 | 46    | 55585     | 2(2)              | 4.3          |
| 87 | Peroxidase OS=Tamarix hispida OX=189793 GN=POD2 PE=2 SV=1                                              | C0KKH7     | 46    | 36304     | 1(1)              | 1.8          |
| 88 | Ubiquitin thioesterase OTU1 OS=Spinacia oleracea OX=3562 GN=SOVF_156820 PE=4 SV=1                      | A0A0K9QPB3 | 46    | 23731     | 1(1)              | 5.3          |
| 89 | TPR_REGION domain-containing protein (Fragment) OS=Opuntia streptacantha OX=393608 PE=4 SV=1           | A0A7C8ZUV3 | 45    | 18155     | 1(1)              | 7.3          |
| 90 | Ribosomal protein S19 OS=Drosera erythrorhiza OX=2005751 GN=tps19 PE=3 SV=1                            | A0A1Z1GBD9 | 45    | 10866     | 1(1)              | 8.6          |
| 91 | Ubiquinone biosynthesis protein OS=Opuntia streptacantha OX=393608 PE=3 SV=1                           | A0A7C8YDY4 | 45    | 20731     | 1(1)              | 4.9          |
| 92 | Cysteine proteinase inhibitor OS=Spinacia oleracea OX=3562 GN=SOVF_083420 PE=3 SV=1                    | A0A0K9RC70 | 45    | 32151     | 1(1)              | 3.2          |

Continued Table S4

| N.  | Description                                                                                                      | Accession   | Score | Mass (Da) | Peptides (Unique) | Coverage (%) |
|-----|------------------------------------------------------------------------------------------------------------------|-------------|-------|-----------|-------------------|--------------|
| 93  | Uncharacterized protein OS=Chenopodium quinoa OX=63459 PE=4 SV=1                                                 | A0A803N5S8  | 45    | 118708    | 1(1)              | 1.3          |
| 94  | Ferritin OS=Beta vulgaris subsp. vulgaris OX=3555 GN=BVRB_2g044700 PE=3 SV=1                                     | A0A0J8BHE5  | 45    | 29868     | 1(1)              | 3.4          |
| 95  | Germin-like protein OS=Beta vulgaris subsp. vulgaris OX=3555 GN=BVRB_001170 PE=3 SV=1                            | A0A0J8B8Q5  | 44    | 22570     | 1(1)              | 7.1          |
| 96  | CCT-beta OS=Spinacia oleracea OX=3562 GN=SOVF_080100 PE=3 SV=1                                                   | A0A0K9RD41  | 44    | 57622     | 1(1)              | 2.3          |
| 97  | Uncharacterized protein OS=Beta vulgaris subsp. vulgaris OX=3555 GN=BVRB_9g209130 PE=3 SV=1                      | A0A0J8BKL6  | 44    | 20978     | 1(1)              | 4.4          |
| 98  | Malate dehydrogenase OS=Opuntia streptacantha OX=393608 PE=3 SV=1                                                | A0A7C8ZW35  | 44    | 36113     | 1(1)              | 6.6          |
| 99  | CCT-theta OS=Opuntia streptacantha OX=393608 PE=3 SV=1                                                           | A0A7C8ZZY3  | 44    | 59064     | 1(1)              | 2            |
| 100 | GrpE protein homolog OS=Opuntia streptacantha OX=393608 PE=3 SV=1                                                | A0A7C9E1C7  | 44    | 29986     | 1(1)              | 4.1          |
| 101 | Peroxiredoxin OS=Beta vulgaris subsp. vulgaris OX=3555 GN=BVRB_010570 PE=3 SV=1                                  | tA0A0J8B2B8 | 43    | 24516     | 1(1)              | 5            |
| 102 | PRA1 family protein OS=Opuntia streptacantha OX=393608 PE=3 SV=1                                                 | A0A7C8YMH8  | 43    | 23315     | 1(1)              | 6.9          |
| 103 | Non-specific serine/threonine protein kinase OS=Spinacia oleracea OX=3562 GN=SOVF_122500 PE=4 SV=1               | A0A0K9R1K3  | 43    | 59199     | 1(1)              | 2.1          |
| 104 | Biotin carboxylase OS=Spinacia oleracea OX=3562 GN=SOVF_065980 PE=4 SV=1                                         | A0A0K9RHG8  | 43    | 58646     | 1(1)              | 2.8          |
| 105 | Protein kinase domain-containing protein (Fragment) OS=Spinacia oleracea OX=3562 GN=SOVF_192390 PE=4 SV=1        | A0A0K9QD95  | 43    | 46460     | 1(1)              | 1.9          |
| 106 | Protein translocase subunit SecA OS=Spinacia oleracea OX=3562 GN=SOVF_169110 PE=3 SV=1                           | A0A0K9QMF2  | 42    | 114333    | 1(1)              | 1.3          |
| 107 | Uncharacterized protein OS=Chenopodium quinoa OX=63459 PE=4 SV=1                                                 | A0A803L847  | 42    | 176812    | 1(1)              | 0.7          |
| 108 | D-3-phosphoglycerate dehydrogenase OS=Spinacia oleracea OX=3562 GN=SOVF_126730 PE=3 SV=1                         | A0A0K9QYI9  | 41    | 57587     | 1(1)              | 3.1          |
| 109 | Derlin OS=Spinacia oleracea OX=3562 GN=SOVF_187530 PE=3 SV=1                                                     | A0A0K9QGG3  | 41    | 27883     | 1(1)              | 4.9          |
| 110 | Uncharacterized protein OS=Opuntia streptacantha OX=393608 PE=3 SV=1                                             | A0A7C8Y LZ9 | 41    | 13852     | 1(1)              | 10           |
| 111 | Dihydropolyllysine-residue succinyltransferase OS=Beta vulgaris subsp. vulgaris OX=3555 GN=BVRB_009840 PE=3 SV=1 | A0A0J8B2D3  | 41    | 51446     | 1(1)              | 1.7          |
| 112 | Uncharacterized protein OS=Opuntia streptacantha OX=393608 PE=4 SV=1                                             | A0A7C9DW29  | 40    | 36184     | 1(1)              | 4.2          |
| 113 | Allene-oxide cyclase (Fragment) OS=Opuntia streptacantha OX=393608 PE=3 SV=1                                     | A0A7C9APK0  | 40    | 22803     | 1(1)              | 6.7          |
| 114 | Formylglycinamide ribonucleotide amidotransferase OS=Spinacia oleracea OX=3562 GN=SOVF_185900 PE=3 SV=1          | A0A0K9QF72  | 40    | 149942    | 1(1)              | 0.7          |
| 115 | Uncharacterized protein OS=Beta vulgaris subsp. vulgaris OX=3555 GN=BVRB_007550 PE=3 SV=1                        | A0A0J8D0R0  | 40    | 15837     | 1(1)              | 8.5          |

Continued Table S4

| N.  | Description                                                                                                 | Accession  | Score | Mass (Da) | Peptides (Unique) | Coverage (%) |
|-----|-------------------------------------------------------------------------------------------------------------|------------|-------|-----------|-------------------|--------------|
| 116 | Lactoylglutathione lyase OS=Opuntia streptacantha OX=393608 PE=3 SV=1                                       | A0A7C9ED66 | 39    | 42702     | 1(1)              | 1.5          |
| 117 | Uncharacterized protein OS=Opuntia streptacantha OX=393608 PE=4 SV=1                                        | A0A7C9DMB2 | 39    | 22453     | 1(1)              | 7.3          |
| 118 | Uncharacterized protein (Fragment) OS=Opuntia streptacantha OX=393608 PE=4 SV=1                             | A0A7C9CHR1 | 39    | 23990     | 2(2)              | 7.7          |
| 119 | Ribosomal_L6e_N domain-containing protein OS=Opuntia streptacantha OX=393608 PE=3 SV=1                      | A0A7C8YCZ3 | 39    | 25970     | 1(1)              | 5.2          |
| 120 | Uncharacterized protein OS=Opuntia streptacantha OX=393608 PE=3 SV=1                                        | A0A7C9CUJ8 | 39    | 26378     | 1(1)              | 3.9          |
| 121 | Lipoaln_cytosolic_FA-bd_dom domain-containing protein OS=Spinacia oleracea OX=3562 GN=SOVF_207970 PE=3 SV=1 | A0A0K9Q8I4 | 39    | 21646     | 1(1)              | 5.3          |
| 122 | Aspartokinase OS=Spinacia oleracea OX=3562 GN=SOVF_023510 PE=3 SV=1                                         | A0A0K9RXL4 | 38    | 100956    | 1(1)              | 0.9          |
| 123 | Reticulon-like protein OS=Opuntia streptacantha OX=393608 PE=4 SV=1                                         | A0A7C9DIY1 | 38    | 28770     | 1(1)              | 5.5          |
| 124 | Uncharacterized protein OS=Spinacia oleracea OX=3562 GN=SOVF_192730 PE=3 SV=1                               | A0A0K9QD37 | 38    | 38000     | 1(1)              | 2            |
| 125 | Malate dehydrogenase OS=Spinacia oleracea OX=3562 GN=SOVF_046560 PE=3 SV=1                                  | A0A0K9RNG9 | 38    | 35899     | 1(1)              | 2.7          |
| 126 | Uncharacterized protein OS=Opuntia streptacantha OX=393608 PE=4 SV=1                                        | A0A7C8ZGD5 | 38    | 56683     | 1(1)              | 1.5          |
| 127 | Uncharacterized protein OS=Spinacia oleracea OX=3562 GN=SOVF_107000 PE=4 SV=1                               | A0A0K9R4R0 | 36    | 181965    | 1(1)              | 0.4          |
| 128 | Uncharacterized protein OS=Chenopodium quinoa OX=63459 PE=4 SV=1                                            | A0A803KTW4 | 36    | 47501     | 1(1)              | 2.1          |
| 129 | Uncharacterized protein (Fragment) OS=Opuntia streptacantha OX=393608 PE=4 SV=1                             | A0A7C9EID3 | 36    | 13180     | 1(1)              | 8            |
| 130 | Uncharacterized protein OS=Chenopodium quinoa OX=63459 PE=4 SV=1                                            | A0A803KPQ9 | 36    | 114105    | 1(1)              | 0.8          |
| 131 | Uncharacterized protein (Fragment) OS=Opuntia streptacantha OX=393608 PE=3 SV=1                             | A0A7C8ZY03 | 36    | 15483     | 1(1)              | 6.3          |
| 132 | PLAT domain-containing protein OS=Opuntia streptacantha OX=393608 PE=4 SV=1                                 | A0A7C9CMR0 | 36    | 19550     | 1(1)              | 5.4          |
| 133 | Uncharacterized protein (Fragment) OS=Opuntia streptacantha OX=393608 PE=3 SV=1                             | A0A7C8ZZR8 | 36    | 20251     | 1(1)              | 6.7          |
| 134 | Uncharacterized protein OS=Opuntia streptacantha OX=393608 PE=4 SV=1                                        | A0A7C8YTC3 | 36    | 47890     | 1(1)              | 2.7          |
| 135 | Uncharacterized protein OS=Spinacia oleracea OX=3562 GN=SOVF_117760 PE=4 SV=1                               | A0A0K9R339 | 36    | 101275    | 1(1)              | 0.7          |
| 136 | Uncharacterized protein OS=Beta vulgaris subsp. vulgaris OX=3555 GN=BVRB_3g065360 PE=3 SV=1                 | A0A0J8FG58 | 36    | 54945     | 1(1)              | 2.2          |
| 137 | Cellulose synthase OS=Spinacia oleracea OX=3562 GN=SOVF_167560 PE=3 SV=1                                    | A0A0K9QMU6 | 35    | 118591    | 1(1)              | 0.7          |
| 138 | Usp domain-containing protein (Fragment) OS=Opuntia streptacantha OX=393608 PE=4 SV=1                       | A0A7C9DG99 | 35    | 14923     | 1(1)              | 6            |

Continued Table S4

| N.  | Description                                                                                                     | Accession  | Score | Mass (Da) | Peptides (Unique) | Coverage (%) |
|-----|-----------------------------------------------------------------------------------------------------------------|------------|-------|-----------|-------------------|--------------|
| 139 | Alpha-1,4 glucan phosphorylase OS=Beta vulgaris subsp. vulgaris OX=3555 GN=BVRB_2g046340 PE=3 SV=1              | A0A0J8E823 | 35    | 110302    | 1(1)              | 0.6          |
| 140 | Adenosinetriphosphatase (Fragment) OS=Opuntia streptacantha OX=393608 PE=4 SV=1                                 | A0A7C9DIR4 | 34    | 24101     | 1(1)              | 6.5          |
| 141 | NAD(P)H dehydrogenase (quinone) OS=Spinacia oleracea OX=3562 GN=SOVF_195640 PE=4 SV=1                           | A0A0K9QC65 | 34    | 20094     | 1(1)              | 7.4          |
| 142 | Uncharacterized protein (Fragment) OS=Spinacia oleracea OX=3562 GN=SOVF_207490 PE=3 SV=1                        | A0A0K9Q8M8 | 34    | 20562     | 1(1)              | 5.1          |
| 143 | Malate synthase OS=Opuntia streptacantha OX=393608 PE=3 SV=1                                                    | A0A7C8ZIT7 | 34    | 46998     | 1(1)              | 2.4          |
| 144 | Phosphoenolpyruvate carboxylase (Fragment) OS=Anredera baselloides OX=1038467 GN=ppc-1E1a PE=4 SV=1             | A0A075IYP2 | 34    | 36088     | 1(1)              | 3.2          |
| 145 | Protein-methionine-S-oxide reductase OS=Opuntia streptacantha OX=393608 PE=3 SV=1                               | A0A7C8YWM6 | 34    | 12347     | 2(2)              | 20.2         |
| 146 | Uncharacterized protein OS=Chenopodium quinoa OX=63459 PE=4 SV=1                                                | A0A803M627 | 34    | 22027     | 1(1)              | 5.8          |
| 147 | Uncharacterized protein OS=Opuntia streptacantha OX=393608 PE=3 SV=1                                            | A0A7C9DPF6 | 33    | 56110     | 1(1)              | 2.2          |
| 148 | EngB-type G domain-containing protein OS=Spinacia oleracea OX=3562 GN=SOVF_207810 PE=3 SV=1                     | A0A0K9QA42 | 33    | 23645     | 1(1)              | 6.6          |
| 149 | Uncharacterized protein (Fragment) OS=Opuntia streptacantha OX=393608 PE=4 SV=1                                 | A0A7C8ZTY5 | 33    | 12066     | 1(1)              | 5.7          |
| 150 | TCTP domain-containing protein (Fragment) OS=Opuntia streptacantha OX=393608 PE=3 SV=1                          | A0A7C9A5U1 | 33    | 12322     | 1(1)              | 8.3          |
| 151 | 4HBT domain-containing protein OS=Spinacia oleracea OX=3562 GN=SOVF_212720 PE=3 SV=1                            | A0A0K9Q7A9 | 33    | 17040     | 1(1)              | 3.8          |
| 152 | Uncharacterized protein OS=Spinacia oleracea OX=3562 GN=SOVF_092000 PE=3 SV=1                                   | A0A0K9RAQ0 | 33    | 17219     | 1(1)              | 8.8          |
| 153 | Uncharacterized protein OS=Spinacia oleracea OX=3562 GN=SOVF_074910 PE=3 SV=1                                   | A0A0K9RG77 | 33    | 286882    | 1(1)              | 0.7          |
| 154 | PB1 domain-containing protein OS=Spinacia oleracea OX=3562 GN=SOVF_166830 PE=4 SV=1                             | A0A0K9QL33 | 33    | 85773     | 1(1)              | 0.8          |
| 155 | Uncharacterized protein OS=Opuntia streptacantha OX=393608 PE=3 SV=1                                            | A0A7C8YCZ0 | 32    | 27847     | 1(1)              | 4.9          |
| 156 | Reverse transcriptase domain-containing protein OS=Beta vulgaris subsp. vulgaris OX=3555 PE=4 SV=1              | F4NCJ4     | 32    | 157039    | 1(1)              | 1.1          |
| 157 | 60S ribosomal protein L13 OS=Spinacia oleracea OX=3562 GN=SOVF_142670 PE=3 SV=1                                 | A0A0K9QV99 | 32    | 23811     | 1(1)              | 2.9          |
| 158 | Uncharacterized protein (Fragment) OS=Opuntia streptacantha OX=393608 PE=4 SV=1                                 | A0A7C8YK87 | 32    | 11461     | 1(1)              | 5.9          |
| 159 | 14_3_3 domain-containing protein OS=Opuntia streptacantha OX=393608 PE=3 SV=1                                   | A0A7C9F4I6 | 32    | 23421     | 1(1)              | 7.8          |
| 160 | Bifunctional dihydrofolate reductase-thymidylate synthase OS=Spinacia oleracea OX=3562 GN=SOVF_062630 PE=3 SV=1 | A0A0K9RIF4 | 32    | 63193     | 1(1)              | 1.4          |
| 161 | Uncharacterized protein OS=Spinacia oleracea OX=3562 GN=SOVF_131520 PE=4 SV=1                                   | A0A0K9QX48 | 32    | 66773     | 1(1)              | 2.8          |

Continued Table S4

| N.  | Description                                                                                                                | Accession  | Score | Mass (Da) | Peptides (Unique) | Coverage (%) |
|-----|----------------------------------------------------------------------------------------------------------------------------|------------|-------|-----------|-------------------|--------------|
| 162 | Ribosomal_L6 domain-containing protein (Fragment) OS=Opuntia streptacantha OX=393608 PE=3 SV=1                             | A0A7C8ZLQ1 | 31    | 15674     | 1(1)              | 10.8         |
| 163 | Phenylcoumaran benzylic ether reductase-like protein I (Fragment) OS=Cylindropuntia imbricata OX=701514 PE=2 SV=1          | A0A3G4R8N0 | 31    | 32063     | 1(1)              | 4.1          |
| 164 | Pyrophosphate--fructose 6-phosphate 1-phosphotransferase subunit alpha OS=Spinacia oleracea OX=3562 GN=PFP-ALPHA PE=3 SV=1 | A0A0K9QFM3 | 30    | 68472     | 1(1)              | 1.3          |
| 165 | Malectin_like domain-containing protein OS=Opuntia streptacantha OX=393608 PE=4 SV=1                                       | A0A7C9DPM0 | 30    | 69601     | 1(1)              | 1.3          |
| 166 | NTP_transferase domain-containing protein OS=Spinacia oleracea OX=3562 GN=SOVF_118350 PE=4 SV=1                            | A0A0K9R188 | 30    | 45858     | 1(1)              | 3.2          |
| 167 | Tubulin alpha chain OS=Beta vulgaris subsp. vulgaris OX=3555 GN=BVRB_5g125100 PE=3 SV=1                                    | A0A0J8E3G3 | 30    | 50783     | 1(1)              | 2.6          |
| 168 | Uncharacterized protein OS=Chenopodium quinoa OX=63459 PE=4 SV=1                                                           | A0A803L2J9 | 30    | 181673    | 1(1)              | 0.4          |
| 169 | Uncharacterized protein OS=Beta vulgaris subsp. vulgaris OX=3555 GN=BVRB_2g046040 PE=3 SV=1                                | A0A0J8E851 | 30    | 23784     | 1(1)              | 5.2          |
| 170 | Heat shock protein 90 OS=Salicornia europaea OX=206448 PE=2 SV=1                                                           | L7QJJ0     | 29    | 79996     | 1(1)              | 0.9          |
| 171 | Uncharacterized protein (Fragment) OS=Opuntia streptacantha OX=393608 PE=4 SV=1                                            | A0A7C9A5J3 | 28    | 13308     | 1(1)              | 13.9         |
| 172 | Uncharacterized protein OS=Opuntia streptacantha OX=393608 PE=3 SV=1                                                       | A0A7C9CDJ2 | 28    | 13581     | 1(1)              | 6.8          |
| 173 | 40S ribosomal protein S7 OS=Spinacia oleracea OX=3562 GN=SOVF_134950 PE=3 SV=1                                             | A0A0K9QW07 | 28    | 22112     | 1(1)              | 4.7          |
| 174 | Purple acid phosphatase OS=Spinacia oleracea OX=3562 GN=SOVF_092830 PE=3 SV=1                                              | A0A0K9R972 | 28    | 60725     | 1(1)              | 3            |
| 175 | AAA domain-containing protein OS=Spinacia oleracea OX=3562 GN=SOVF_151020 PE=3 SV=1                                        | A0A0K9QSR5 | 28    | 47213     | 1(1)              | 3.1          |
| 176 | Uncharacterized protein OS=Spinacia oleracea OX=3562 GN=SOVF_002290 PE=3 SV=1                                              | A0A0K9S456 | 26    | 17988     | 1(1)              | 5.4          |
| 177 | Protein kinase domain-containing protein OS=Beta vulgaris subsp. vulgaris OX=3555 GN=BVRB_1g021560 PE=3 SV=1               | A0A0J8BFG4 | 25    | 110090    | 1(1)              | 0.7          |
| 178 | Proteasome subunit beta OS=Opuntia streptacantha OX=393608 PE=3 SV=1                                                       | A0A7C9DYH2 | 20    | 29808     | 1(1)              | 3.3          |

**Table S5.** Details for top 10% proteins identified via LC–MS/MS from white-fleshed pitaya seeds allergenicity predicted by three online platforms (Allermatchtm, Algpred 2.0, and AllerCatPro).

| Unpredicted top 10% protein |                                                                                      | Prediction platform |         |             | Allergen information         |                                               |
|-----------------------------|--------------------------------------------------------------------------------------|---------------------|---------|-------------|------------------------------|-----------------------------------------------|
| N.                          | Description                                                                          | Allermatchtm        | Algpred | AllerCatPro | Allergen code                | Allergen source                               |
| 1                           | Uncharacterized protein (Fragment)<br>OS=Beta vulgaris subsp. Vulgaris<br>A0A0J8DSR1 | -                   | -       | no          | -                            | -                                             |
| 2                           | Cupin type-I domain-containing<br>protein OS=Opuntia streptacantha<br>A0A7C8ZNT3     | +                   | +       | week        | Pollen<br>allergen Coc<br>n1 | Cocos nucifera<br>(Coconut)                   |
| 3                           | Uncharacterized protein<br>OS=Spinacia oleracea<br>A0A0K9RTZ6                        | +                   | +       | week        | Pollen<br>allergen Coc<br>n1 | Cocos nucifera<br>(Coconut)                   |
| 4                           | Uncharacterized protein<br>OS=Chenopodium quinoa<br>A0A803LTG6                       | -                   | -       | no          | -                            | -                                             |
| 5                           | Heat shock protein 70 OS=Spinacia<br>oleracea<br>A0A1I9TK81                          | +                   | +       | strong      | Tyr p 28                     | Tyrophagus<br>putrescentiae (Storage<br>mite) |

**Table S6.** Details for top 10% proteins identified via LC–MS/MS from red-fleshed pitaya seeds allergenicity predicted by three online platforms (Allermatchtm, Algpred 2.0, and AllerCatPro)

| Unpredicted top 10% protein |                                                                                           | prediction platform |         |               | Allergen information                                  |                                                                 |
|-----------------------------|-------------------------------------------------------------------------------------------|---------------------|---------|---------------|-------------------------------------------------------|-----------------------------------------------------------------|
| N.                          | Description                                                                               | Allermatchtm        | Algpred | AllerCatPro   | Allergen code                                         | Allergen source                                                 |
| 1                           | Proteasome subunit beta (Fragment) OS=Spinacia oleracea A0A0K9S2G1                        | -                   | -       | <b>no</b>     | -                                                     | -                                                               |
| 2                           | Uncharacterized protein (Fragment) OS=Opuntia streptacantha A0A7C8YRP5                    | -                   | +       | <b>no</b>     | -                                                     | -                                                               |
| 3                           | Cupin type-1 domain-containing protein OS=Opuntia streptacantha A0A7C8ZNT3                | +                   | +       | <b>weak</b>   | Pollen allergen Coc n1                                | <i>Cocos nucifera</i> (Coconut)                                 |
| 4                           | Uncharacterized protein OS=Opuntia streptacantha A0A7C9B091                               | +                   | -       | <b>strong</b> | Major latex allergen Hev b 5<br>Gluten-like Q-repeats | <i>Hevea brasiliensis</i> (Para rubber tree (latex))            |
| 5                           | Heat shock protein 70 OS=Spinacia oleracea A0A1I9TK81                                     | +                   | +       | <b>strong</b> | Tyr p 28                                              | <i>Tyrophagus putrescentiae</i> (Storage mite)                  |
| 6                           | Actin 11 OS=Sesuvium portulacastrum A0A1L5JKA9                                            | -                   | -       | <b>no</b>     | -                                                     | -                                                               |
| 7                           | Ribosomal_L18e/L15P domain-containing protein OS=Beta vulgaris subsp. Vulgaris A0A0J8FEI6 | -                   | -       | <b>no</b>     | -                                                     | -                                                               |
| 8                           | Formamidase OS=Opuntia streptacantha A0A7C9EWT0                                           | -                   | -       | <b>no</b>     | -                                                     | -                                                               |
| 9                           | Uncharacterized protein OS=Spinacia oleracea A0A0K9RTZ6                                   | +                   | +       | <b>weak</b>   | Pollen allergen Coc n1<br>Gly m Bd 28K                | <i>Cocos nucifera</i> (Coconut)<br><i>Glycine max</i> (Soybean) |
| 10                          | Uncharacterized protein (Fragment) OS=Opuntia streptacantha A0A7C8YRL3                    | -                   | +       | <b>no</b>     | -                                                     | -                                                               |
| 11                          | Proteasome subunit beta OS=Opuntia streptacantha A0A7C9D7H1                               | -                   | -       | <b>no</b>     | -                                                     | -                                                               |



Continued Table S6

| Unpredicted top 10% protein |                                                                       | prediction platform |         |             | Allergen information |                                        |
|-----------------------------|-----------------------------------------------------------------------|---------------------|---------|-------------|----------------------|----------------------------------------|
| N.                          | Description                                                           | Allermatchtm        | Algpred | AllerCatPro | Allergen code        | Allergen source                        |
| 12                          | Cupin_5 domain-containing protein OS=Opuntia streptacantha A0A7C9CU14 | -                   | -       | no          | -                    | -                                      |
| 13                          | Uncharacterized protein OS=Opuntia streptacantha A0A7C8ZZS4           | -                   | -       | no          | -                    | -                                      |
| 14                          | GTP-binding nuclear protein OS=Spinacia oleracea A0A0K9R796           | -                   | -       | no          | -                    | -                                      |
| 15                          | Uncharacterized protein OS=Chenopodium quinoa A0A803LTG6              | -                   | -       | no          | -                    | -                                      |
| 16                          | Thioredoxin-dependent peroxiredoxin OS=Tamarix hispida I0CC94         | +                   | +       | week        | thiol peroxiredoxin  | <i>Bombyx mori</i> (domestic silkworm) |
| 17                          | Uncharacterized protein OS=Opuntia streptacantha A0A7C8Z5R6           | -                   | -       | no          | -                    | -                                      |

**Table S7.** CDSs for potential allergens in white- and red-fleshed pitaya seeds.

| CDS<br>name                                | Sequences                                                                                                                                                                                                                                                                                                                                                                                                                                                                                                                                                          | Length<br>(bp) | Location on the genome       |
|--------------------------------------------|--------------------------------------------------------------------------------------------------------------------------------------------------------------------------------------------------------------------------------------------------------------------------------------------------------------------------------------------------------------------------------------------------------------------------------------------------------------------------------------------------------------------------------------------------------------------|----------------|------------------------------|
| <i>Su-cupin1</i><br>Or<br><i>Sc-cupin1</i> | ATGATGGCACCCCATTTGAATCCAACGGCCACAGAGTATGCCG<br>TAGTTTTTAAGCGGACGAGGAAACATCCAGGTAGTCTACCCAA<br>ACGGAAGCTCAGCGATGAGTGCCAGAGTCAGTGAAGGTGATG<br>TCTTCTGGATTCCAAAGTACTTCCCTTTCTGCCAGATTGCTTCC<br>AGGGCTGGCCCATTCGAGTTCTTGGGATTCACCACCTCAGCTC<br>ACCGGAACCGGCCCCAGTTCTAGTGGGTGCCTCCTCAATCCT<br>GAACACCATGCGAGCCCCGAACTTGCAACTGCTTTTGGCTTA<br>ACCGAAGAGAGGTTTCGGCGAGATTGTGGGTGCTCAGAGAGA<br>GGCGGTCATTCTCCGTCTCCTGCAGCTGCTCCACCCGATGGG<br>AAGGAGCGGTCAAAGTCGGAGGGGGAGGGGTCAAATCCGA<br>GGTGGAGGAAAAGAACAAGCTAGAGGTGCCAAAGTTGACTA<br>GGACTTTAGGTCCAGATATGGTCATGGGTTTTGAGTGA | 504            | From 65759275 to<br>65759778 |

*Su* and *Sc* are the abbreviations for *Selenicereus undatus* (white-fleshed pitaya) and *Selenicereus costaricensis* (red-fleshed pitaya), respectively.

Continued Table S7

| CDS name                                                                                                                                                                              | Sequences                                                                                                                                                                                                                                                                                                                                                                                                                                                                                                                                                                                                                                                                                                                                                                                                                                                                                                                                                                                                                                                                                                                                                                                                                                                                                                                                                                                                                                                                                                                                                                                                                                                                                                                                                                                                                                                                                                                                                                                                                                                                                                                   | Length (bp) | Location on the genome                                           |
|---------------------------------------------------------------------------------------------------------------------------------------------------------------------------------------|-----------------------------------------------------------------------------------------------------------------------------------------------------------------------------------------------------------------------------------------------------------------------------------------------------------------------------------------------------------------------------------------------------------------------------------------------------------------------------------------------------------------------------------------------------------------------------------------------------------------------------------------------------------------------------------------------------------------------------------------------------------------------------------------------------------------------------------------------------------------------------------------------------------------------------------------------------------------------------------------------------------------------------------------------------------------------------------------------------------------------------------------------------------------------------------------------------------------------------------------------------------------------------------------------------------------------------------------------------------------------------------------------------------------------------------------------------------------------------------------------------------------------------------------------------------------------------------------------------------------------------------------------------------------------------------------------------------------------------------------------------------------------------------------------------------------------------------------------------------------------------------------------------------------------------------------------------------------------------------------------------------------------------------------------------------------------------------------------------------------------------|-------------|------------------------------------------------------------------|
| <i>Su-hsp70</i><br>Or<br><i>Sc-hsp70</i>                                                                                                                                              | ATGGCCGGTAAAGGTGAAGGTCCGCGCATCGGAATCGATCTCGGAACGACATACTCATGCGTCGGTGTCTGG<br>CAGCATGATCGTGTGAGATCATCGCAATGATCAAGGAAATCGTACCACACCGTCTTATGTTGCTTTCACCGA<br>CACTGAGCGTTTGATCGGTGATGCTGCTAAGAATCAGGTCGCCATGAATCCTACCAACACCGTATTGATGCTA<br>AGAGGCTTATCGGAAGGAGGTTTCAGTGACTCATCTGTTTCAGAATGACATGAAACTCTGGCCATTAAAGGTCAT<br>TGCTGGTGTGGTGACAAGCCTATGATTGTGGTAACATATAAGGGTGAGGAGAAGCAATTTGCAGCTGAAGA<br>GATCTCTCAATGGTCCTCACAAAGATGAAAGAGATTGCGGAGGCCTACCTTGGCTCAACGGTGAAAAACGC<br>TGTTGTCACTGTTCTGCTTACTTCAACGATTCCCAGCGTCAAGCTACAAAGGATGCTGGTGTCAATTGCTGGC<br>TTGAATGTTATGCGAATCATCAACGAGCCAACCGCTGCTGCTATTGCCTATGGTCTTGACAAGAAGGCCACCA<br>GCATTGGCGAGAAGAACGTCCTGATCTTTGATCTTGGTGGTGGTACCTTTGATGTCTCGTTGCTTACTATTGAG<br>GAGGGTATCTTTGAGGTGAAAGCCACAGCTGGAGACACCCATCTTGGTGGTGAGGATTTTGACAACCGAATG<br>GTAAACCATTTTGTCCAGGAGTTCAAGAGAAAAGCACAAAGAAGGATATCAGCGGCAGCCCAAGGGCTCTTAGG<br>AGGCTGAGGACTGCATGTGAGAGGGCAAAGAGGACTCTCTCATCCACTGCCCCAAACCACCATGAAATTGAC<br>TCCCTCTATGAGGGTGTGATTTCTACACCACCATACCCGTGCTCGTTTGGAGGAGCTGAACATGGATTGTT<br>TAGGAAATGTATGGAGCCAGTGGAGAAGTGTGAGGGATGCTAAGATGGACAAGAGTAGCGTGATGATGT<br>TGTCTTGTGGAGGATCCACTAGGATTCCCAAGGTCCAGACGCTGTTGCAGGACTTCTTCAACGGCAAGGA<br>GCTGTGCAAAAGCATTAACCCAGATGAGGCGGTTGCCTATGGTGCCGCTGTGCAAGCTGCCATCTTGAGTGGT<br>GAAGGGAACGAGAAGGTCCAGGACCTCCTGTTGCTCGATGTCACTCCTCTCTCCCTTGGTTTGAAACCGCT<br>GGTGGAGTCATGACTGTGTTGATCCCTAGGAATACCACCATTCCAACCAAGAAAAGAGCAGGTCTTCTCAACG<br>TACTCGGACAACCAGCCGGGTGTGTTGATCCAGGTTTACGAGGGTGAGAGAACTCGGACACGGGATAACAAC<br>TTGCTGGGAAAAGTTTGAGCTTTCCGGCATCCCTCCCGCCCTAGAGGTGTACCCAGATTACAGTGTGCTTTG<br>ACATTGATGCCAATGGTATCTTGAATGTTTCTGCTGAGGACAAGACTACTGGGCAGAAGAACAAGATCACCAT<br>CACCAACGACAAGGGCAGGTGTCAAAAGAAGAGATCGAGAAGATGGTCCAGGAGGCTGAGAAGTACAAG<br>ACTGAAGATGAGGAGCACAAAGAAGAAGGTGGAGGCAAAGAATGCTTTGGAGAACTACGCCTACAACATGAG<br>GAATACTGTAAGGGATGAGAAGATTGGTGCGAAGTTGCGCAGAGGCCGACAAGAAGAAGATCGAGGATGCTAT<br>CGACAATGCCATCCAGTGGTTGGATAATAATCAGCTTGCTGAGGCTGATGAATTTGAGGACAAAATGAAGGAG<br>CTCGAGAGTATCTGCAACCCCATATTGCCAAGATGTACCAGGGTGTGCTGGGGGTGACATGGGTGGTGCC<br>ATGGATGATGATGCCCCCTCTGCTGGTGCAAGTGGCGCTGGTCCCAAGATTGAGGAGGTTGATTAA | 1949        | From 32343233<br>to 32344969 and<br>from 32345659<br>to 32345870 |
| <p><i>Su</i> and <i>Sc</i> are the abbreviations for <i>Selenicereus undatus</i> (white-fleshed pitaya) and <i>Selenicereus costaricensis</i> (red-fleshed pitaya), respectively.</p> |                                                                                                                                                                                                                                                                                                                                                                                                                                                                                                                                                                                                                                                                                                                                                                                                                                                                                                                                                                                                                                                                                                                                                                                                                                                                                                                                                                                                                                                                                                                                                                                                                                                                                                                                                                                                                                                                                                                                                                                                                                                                                                                             |             |                                                                  |

Continued Table S7

| CDS name             | Sequences                                                                                                                                                                                                                                                                                                                                                                                                                                                                                                                                                                                                                                                                                                                                                                                                                                                                                                                                                                                                                                                                                                                                                                                                                                                                                                                                                                                                                                                                                                                                                                                                                                                                                                           | Length (bp) | Location on the genome                                                                             |
|----------------------|---------------------------------------------------------------------------------------------------------------------------------------------------------------------------------------------------------------------------------------------------------------------------------------------------------------------------------------------------------------------------------------------------------------------------------------------------------------------------------------------------------------------------------------------------------------------------------------------------------------------------------------------------------------------------------------------------------------------------------------------------------------------------------------------------------------------------------------------------------------------------------------------------------------------------------------------------------------------------------------------------------------------------------------------------------------------------------------------------------------------------------------------------------------------------------------------------------------------------------------------------------------------------------------------------------------------------------------------------------------------------------------------------------------------------------------------------------------------------------------------------------------------------------------------------------------------------------------------------------------------------------------------------------------------------------------------------------------------|-------------|----------------------------------------------------------------------------------------------------|
| <i>Sc- hsp sti 1</i> | ATGGCTGAAGAGGCCAAAGCCAAAGGCAACGCCGCCTTCGC<br>CGCCGGCAACTACACGGAGGCCATTAAGCACTTCACGGAGGG<br>GATCATCCTGGCCCCACCAACCACGTCTCTACTCCAACAGA<br>TCCGCCGCATACGCCTCCCTCCACAATACTCCGACGCCCTCT<br>CCGATGCCAAGAAGACGGTCGACCTCAAGCCCGACTGGTCCA<br>AGGGCTACAGCCGCCTTGGCGCCGCCTATCTCGGCCTCCATAA<br>CTACTCCGAAGCCATCGCCGCCTACAAGCATGGCCTTGAAATC<br>GACCCCAATAACGAGGCTCTGAAATCCGGCTTAGCCGATGCG<br>CAAGCAGCCGCCGCCGCCCGAGCCAGGTCGACCTCGCCGCCT<br>TCCCCCTTCGGCGACGTCTTCTCCGGGCAGGAGATGTGGGCC<br>AAGCTCACGGCGGACCCCACTCGGGCATTCCTCCAGCAG<br>CCTGATTTCTGTCAGCATGATGCAGGACATTCAGAAGAACCCTA<br>ATAATCTGAATCTATACTTGAAGGATCAGAGGGTTATGCAGGC<br>TCTTGGGGCTCTTTGAATGTCAAATTGAGGACTGCAACTGAG<br>GATATGGAAGTGGAACACCTTTTCTGAGGAGGAGCCGGTG<br>AAGAAGCCCGAGCCAGAGCCTCGACGGGAGCCGGAGCCTGA<br>GCCCATCGAGCTGGCGGAGGAGAGAGAGAAAGGAAGGAA<br>AAGAAGGCATTGGCCCAGAAGGAGAAAAGAGGCTGGCAATGC<br>TGCTTATAAGAAGAAGGATTTTGAAGGCTGCTATTCAGCATTAC<br>ACCAAGGCCATTGAATTGGATGATGAGGATATTTCCTTCTTCA<br>CTAATCGTGCTGCTGTTTACTTGGAGATGGGAAAGGTACGATG<br>AGTGTATCAAAGACTGTGACAAAGCTGTTGAAAGAGGAAGG<br>GAACTTCGATCAGACTACAAGATGATAGCAAGGGCTTTGACC<br>AGGAAAGGAACTGCCTTGGTTAAGATGGCAAAGACTTCAAAG<br>GACTTTGAGACGGCTATTGAAGCTTTTCAGAAAGCTCTCACTG<br>AGCATCGCAATCCTGATACATTGAAAAAGTTGAACGATGCTGA<br>AAGAGCAAAGAAAGAACTAGAGCAGCAGGAGTACTTTGATC<br>CAAAAATAGCCGATCAGGAACGTGAAAAAGGAGGCATATAGC<br>AACAGAGCTGCATGTTACACGAAATTGGGGGCATTGCCAGAA<br>GCTCTAAAAGATGCAGAGAAGTGATCAAGCTTGATCCTACAT<br>TTGTGAAGGGATATACTAGGAAGGGTGCTGCCAGTTTTTGAT<br>GAAGGAGCATGATAAAGCATTGGAAACCTATCAAGAAGGGCT<br>TAAGCATGATCCCAACAACCAGGAATTGTTGGATGGGGTGCG<br>GAGGTGTGTCAGGTATTGATTGACTTCCAAGAGAATCCAAAG<br>GCAGCACAAAGAGCATATGAAGAACCCAATGGTGATGAACAAG<br>ATCCAGAAGCTGGTCAGCGCTGGAATTGTCCAAGTCAGATGA | 1519        | From 8614836 to 8615721, from 8616533 to 8616816, from 8617196 to 8617427, from 8617842 to 8617958 |

*Su* and *Sc* are the abbreviations for *Selenicereus undatus* (white-fleshed pitaya) and *Selenicereus costaricensis* (red-fleshed pitaya), respectively.

**Supplement information S8.** The distribution of identified peptides in the top 10% of protein identified via LC–MS/MS in excised gel spot from white-fleshed pitaya seeds (The peptides coverages have been marked with highlight).

>tr|A0A0J8DSR1|A0A0J8DSR1\_BETVV Uncharacterized protein (Fragment) OS=Beta vulgaris subsp. vulgaris OX=3555 GN=BVRB\_027930 PE=3 SV=1

SIRVAPLRAMCDDEVQALVVDNGSGMVKAGFAGDDAPRAVFPISVGRPRHTGIMVGATQ  
KDAYVGDEAQAKRGILTLKYPIEHGIVTNWDDMEKIWHHTFYNELRVAPEEHPVLLTEAP  
LNPKANREKMTQIMFETFNTPAMYVAIQAVLSLYASGRRTGIVLDCGDGVSHTVPIYEGYA  
LPHAILRLDLAGRDLTDYLMKILTERGYSFTTTAEREIVRDIKEKLAYCALDFDTEM

>tr|A0A7C8ZNT3|A0A7C8ZNT3\_OPUST Cupin type-1 domain-containing protein OS=Opuntia streptacantha OX=393608 PE=4 SV=1

MMAPHLNPMATEYGIVLSGRGKIQVVYPNGSSAMNARVSEGDVFWIPKYFPFCQIASRTG  
PFEFFGFTTSAHRNRPQFLVGASSILNAMRGPELATAFGLTEERFDEIVSAQREAVILPSPAA  
APPDESGGSKSEQEGLDSETEKKKTVVPKLIRTLGPAMVMGFE

>tr|A0A0K9RTZ6|A0A0K9RTZ6\_SPIOL Uncharacterized protein OS=Spinacia oleracea OX=3562 GN=SOVF\_029540 PE=4 SV=1

MGRLKGVLLVALVVCYAMQVVVSQS YEERRRERELMSPEEEERRAKEEDWRRREKTAEE  
ERRHRSWEEEEEEEEERGRKWDEDEEEQEEEEERGRQPRPKPRPEPYRPGGRGEGMF  
VLRDSKKVISTQAGEMRVVRGYGGKIVENPLDIGFITMEPRSLFVPQYLDSSLIIFLRRGEA  
KLGFYDDELSEKQLKMGDVYRIPAGSTFYIVNTGETQRLHIICSIDPSEGLGFSTFQSFFIGG  
GTNPVSVLAGFDPETLSTAFNVSIGELRGFMTGQDAGPIIFADTTTHSPSLWANFLKVKGEEER  
LERLKTVAESGEQKEEEEEEPKSWWNIFDSLIGSENKKGEKKGDTRTGSSPDSYNLLDRE  
PSYRNNYGWSIAVDKHEYKPLKKSIGGVYLVNLTAGSMMPHVNPIMATEYGVVLSGVGT  
IQVVYPNGTSAMNTNVKEGDVFWIPRYFPFCQIASRSGSFEFFGFTTSAHRNRPQFLVGAS  
SILRSMRGPEFATAFGLTEDRYNEIVDAQREALILPSPSAASGDTREFEEKEQSSQEKKPESK  
EQEKEKPGIEKVPKFMRTLGPIMMGFE

>tr|A0A803LTG6|A0A803LTG6\_CHEQI Uncharacterized protein OS=Chenopodium quinoa OX=63459 PE=3 SV=1

MRQCLIYDSPEADARLIGIEYIVSEDLFMTLPDAEKRLWHSHEYEVKSGVLFLPGVPGAM  
QRPDLAKVAQTYGKTIHFQVDRGDNLPGLPQIMMALTRDGQLYTHLASDVEKKYNV  
NFEKERENRAYMKGLEHGIHPLANAEKGKLRTELREVDCHGGAGAHSTPRVFV

>tr|A0A1I9TK81|A0A1I9TK81\_SPIOL Heat shock protein 70 OS=Spinacia oleracea OX=3562 GN=HSP70-13 PE=2 SV=1

MSGKGEGPAIGIDLGTYSVGVWQHDRVETIANDQGNRTTPSYVAFTDTERLIGDAAKN  
QVAMNPTNTVFDAKRLIGRRVSDPSVQADMKLWPFKVIPGPADKPMIVVNYKGEEKQFS  
AEEISSMVLTKMKEIAEAFLGTTIKNAVVTVPAYFNDSQRQATKDAGVISGLNVMRIINEPT  
AAAIAYGLDKKASSSGEKHVLIFDLGGGTDFVSLLTIEEGIFEVKATAGDTHLGGEDFDNR  
MVNHVQVEFRKHKKDISGNPRSLRRLRTACERAKRTLSSTAQTIEIDSLYEGVDFTTIT  
RARFEELNMDLFRKCMPEVVEKCLRDAKMDKGNVDDVVLVGGSTRIPKVQQLQDFFNG

KELCKSINPDEAVAYGAAVQAAILS GEGNEKVQDLLLLDVTPLSLGLETAGGVMTVLIPRN  
TTIPTKKEQVFSTYSDNQPGVLIQVFEGERTTRDNNLLGKFELTGIPPAPRGVPQINVCFDI  
DANGILNVSAEDKTTGQKNKITITNDKGRLSKEEIEKMQEAERYKSEDEEHKKKVEAKN  
ALENYAYNMRNTIKDDKINSKLDAADKKKIEEAIEQAIQWLDGNQLAEADEFDKMKEL  
EGICNP IAKMYQGGAGAGPDMGGTMDEDAPSAGGASGAGPKIEEVD

**Supplement information S9.** The distribution of identified peptides in the top 10% of protein identified via LC–MS/MS in excised gel spot from red-fleshed pitaya seeds (The peptides coverages have been marked with highlight).

>tr|A0A0K9S2G1|A0A0K9S2G1\_SPIOL Proteasome subunit beta (Fragment) OS=Spinacia oleracea OX=3562 GN=SOVF\_007620 PE=3 SV=1  
VLCDLHLYSPLSSFPFHHLQNRPIQLQPLSLSPQHTKMEDLGLNAPHSMGTTIIGVTYKDG  
VILGADSRTSTGVYVANRASDKITQLTDNVYVCRSGSAADSQIVSDYVRYFLHQHTIQLGQ  
PATVKVAANLVRLAYGNKDTLQTMIVGGWDKYEGGKIYGIPLGGTIIQQPFSIGSGSS  
YLYGFLDQAWKDGMSKDEAEELVKKAVSLAIARDGASGGVVRTVIINEEGVTRNFYPGD  
QLPLWHEELEPQNSLLDIWGAAAASPVPMTE

>tr|A0A7C8YRP5|A0A7C8YRP5\_OPUST Uncharacterized protein (Fragment) OS=Opuntia streptacantha OX=393608 PE=4 SV=1  
VYVCRSGSAADSQIVSDYVRYFLHQHTIQLGQPATVKVAANLVRLAYNNKNMLQTGLIV  
GGWDKYEGGKIYGIPLGGTIIQQPFAIGSGSSYLYGFFDQAWREGMTKEEAEQLVVKAVS  
LAIARDGASGGVVRTVINSEG

>tr|A0A7C8ZNT3|A0A7C8ZNT3\_OPUST Cupin type-1 domain-containing protein OS=Opuntia streptacantha OX=393608 PE=4 SV=1  
MMAPHLNPMATEYIGIVLSGRGKIQVVYPNGSSAMNARVSEGDVFWIPKYFPFCQIASRTG  
PFEFFGFTTSAHRNRPQFLVGASSILNAMRGPELATAFGLTEERFDEIVSAQREAVILPSPAA  
APPDESGGSKSEQEGLDSETEKKKTVVPKLI RTLG PAMVMGFE

>tr|A0A7C9B091|A0A7C9B091\_OPUST Uncharacterized protein OS=Opuntia streptacantha OX=393608 PE=4 SV=1  
MADEAKAKGNAAFSAGNYTEAIKHFTAINLAPTNHVLYSNRSAAYASLHNYSDALSDA  
KKTVELKADWSKGY SRLGAAYLGLHQYSDAIAAYKQGLEIDPNNEALKSGLADAQAAA  
RAKSTPLPSPFGDVFSGPEMWAKLTADPATRAFLQQPDFVSMQDIQKNPSNLNLYLKDQ  
RVMQALGVLLNVKLRTAPEDMEVPPAEELPLKKEEPAKKPEPKPQPQPEPEPEPVAEEEEKE  
KKERKALAQKEKEAGNAAYKKKDFETAIQHYTKAIELDDEDISFLTNRAAVYLEMGKYD  
ECIKDCDKAVERGRELRSDFKMIARALTRKGTA FVKMAKTSKDYEP AIEAFQKALTEHRN  
PDTLKKLNEAGRAKKELEQQEYFDPKIADEEREKGNEYFKEQKYPEAVKHYTEAIKRNP  
DPKAYS NRAACYTKLGALPEGLRDAEKCIELDPTFVKGYTRKGAVQFFMKEYDKALETY  
QEGCLKLDPNNQELLDGVRRCVEQINKASRGDLSPEELKERQAKAMQDPEIQTILTDPMR  
QVLIDFQENPKAAQEHMKNPMVMNKKIQLVSAGIVQVR

>tr|A0A1I9TK81|A0A1I9TK81\_SPIOL Heat shock protein 70 OS=Spinacia oleracea OX=3562 GN=HSP70-13 PE=2 SV=1  
MSGKGEGPAIGIDLGTYS CVGVWQHDRVEIIANDQGNRTTPSYVAFTDTERLIGDAAKN  
QVAMNPTNTVFDAKRLIGRRVSDPSVQADMKLWPFKVIPGPADKPMIVVNYKGEEKQFS  
AEEISSMVLTKMKEIAEAF LGTTIKNAVVTVPAYFNDSQRQATKDAGVISGLNVMRIINEPT  
AAAIAYGLDKKASSSGEKHVLIFDLGGGTFDVSLLTIEEGIFEVKATAGDTHLGGEDFDNR  
MVNHVFQEFRRKHKKDISGNPRSLRRLRTACERAKRTLSSTAQT TIEIDSLYEGVDFYTTIT

RARFEELNMDLFRKCMEPVEKCLRDAKMDKGNVDDVVLVGGSTRIPKVQQLLQDFFNG  
KELCKSINPDEAVAYGAAVQAAILSGEGNEKVQDLLLLDVTPLSLGLETAGGVMTVLIPRN  
TTIPTKKEQVFSTYSNDQPGVLIQVFEGERTRTDNNLLGKFELTGIPPAPRGVQPINVCFDI  
DANGILNVSAEDKTTGQKNKITITNDKGRLSKEEIEKMQEAERYKSEDEEHKKKVEAKN  
ALENYAYNMRNTIKDDKINSKLDAAADKKKIEEAIEQAIQWLDGNQLAEADEFDKMKEL  
EGICNPPIAKMYQGGAGAGPDMGGTMDDEDAPSAGGASGAGPKIEEVD

>tr|A0A1L5JKA9|A0A1L5JKA9\_SESPO Actin 11 OS=Sesuvium portulacastrum OX=221166  
PE=2 SV=1

MCDDVQALVIDNGSGMCKAGFAGDDAPRAVFPISVGRPRHTGVMVGMGQKDSYVGDEA  
QSKRGILTLYPIEHGIVTNWDDMEKIWHHTFYNELRVAPEEHPVLLTEAPLNPKANREK  
MTQIMFETFNTPAMYVAIQAVLSLYASGRITGIVMDSGDGVTHTVPIYEGYALPHAILRLD  
LAGRDLTDYLMKILTERGYSFTTTAEREIVRDIKEKLAYVALDFEQEMQTAASSSSLEKSYE  
LPDGQVITIGNERFRCPEALFQPSFLGMEAAGVHETTYNSIMKCDVDIRKDLYGNVVLSG  
GSTMFPGIADRMQKELTALAPSTIKIKIIPPERKYSVWIGGSILASLSTFQQMWISKEEYDE  
SGPSIVHRKCF

>tr|A0A0J8FEI6|A0A0J8FEI6\_BETVV Ribosomal\_L18e/L15P domain-containing protein  
OS=Beta vulgaris subsp. vulgaris OX=3555 GN=BVRB\_4g076000 PE=3 SV=1

MGIDLKAGGKSKTKRTAPKSNVDVYLKLLVKLYRFLVRRTGSSFNQVVLKRLFMKINKA  
PLSLRLITYMKGKEDKIAVIVGAVTDDIRVYEVPAKVTALRFTETARARIEKAGGECLTF  
DQLALRAPLGQNTVLLRGPKNAREAVKHFGKAPGVPHSHTKPYVRANGRKFERARGRR  
NSRGYRV

>tr|A0A7C9EWT0|A0A7C9EWT0\_OPUST Formamidase OS=Opuntia streptacantha  
OX=393608 PE=4 SV=1

NTLARSERPSIPRSPEGTKEMATSYGARTVIAVDVTKKPWEQKPPLHNRWHPDIPPVAVK  
AGEVFRVEMVDFSGGITKDYTAEDVKYADPSVVHYLSGPIKVCDEAGVPAKPGDLLAVE  
ICNLGPLPGDEWGYTATFDRENGGGFLTDHFPCATKAIWYFEGIYAYSPHIPGVRFPGLTHP  
GIIGTAPSKQLLDIWNERRDVEENGLQSLKLCEVLHSRPLANLPSPKGCLLGKIEKGTPE  
WEKIAREAARTIPGRENGGNCIDIKNLSRSGKIYLPVFVEGANLSTGDMHFSQGDGEVSFC  
GAIEMSGFLELKCDIIRGGMKEYLTPMGPTPLHVNPIFEIGPVEPRFSEWLVEGISVDESGR  
QHFLDASIAYKRAVLNAIDYLSKFYSKEQVYLLSCCPCEGRISGIVDAPNAVATLAIPTSI  
FDQDIRPKTSKVPVGPRLVRKADVCLKCTYDGHLPVTRNPAASS

>tr|A0A0K9RTZ6|A0A0K9RTZ6\_SPIOL Uncharacterized protein OS=Spinacia oleracea  
OX=3562 GN=SOVF\_029540 PE=4 SV=1

MGRLKGVLLVALVVCYAMQVVVSQSYEERRRERELMSPEEEERRAKEEDWRRREKTAEE  
ERRHRRSWEEEEEEEEERGRKWDEDEEEQEEEEERGRQPRPKRPEPYRPGGRGGEGMF  
VLRDSKKVISTQAGEMRVVRGYGGKIVENPLDIGFITMEPRSLFVPQYLDSSLIIFLRGEA  
KLGFIYDDELSEKQKMGDVYRIPAGSTFYIVNTGETQRLHIICSIDPSEGLGFSTFQSFFIGG  
GTNPVSVLAGFDPETLSTAFNVSIGELRGFMTGQDAGPIIFADTTTHSPSLWANFLKVKGEER  
LERLKTVAESGEQKEEEEEPRKSWWNIFDSLIGSENKKGEKKGDTRTGSSPDSYNLLDRE  
PSYRNNYGWSIAVDKHEYKPLKKSIGIGVYLVNLTAGSMMAHPVNPIMATEYGVVLSGVGT



IQVVYPNGTSAMNTNVKEGDVFWIPRYFPFCQIASRSGSFEFFGFTTSAHRNRPQFLVGAS  
SILRSMRGPEFATAFGLTEDRYNEIVDAQREALILPSPSAASGDTREFEEKEQSSQEKKPESK  
EQEKEKPGIEKVPKFMRTLGPPEMIMGFE

>tr|A0A7C8YRL3|A0A7C8YRL3\_OPUST Uncharacterized protein (Fragment) OS=Opuntia  
streptacantha OX=393608 PE=4 SV=1

CRSGSAADSQVVSDYVRYFLHQHTIQLGQPATVKVAANLVRLLAYNNKNMLQTGLIVGG  
WDKYDGGKIYGIPLGGTLIEQPFAIGGSGSTYLYGFFDQAWKEGMDKDEAEQLVVKAIVSL  
AIARDGASGGVVRTVIINSEGVTRNFY

>tr|A0A7C9D7H1|A0A7C9D7H1\_OPUST Proteasome subunit beta OS=Opuntia  
streptacantha OX=393608 PE=3 SV=1

MECVFGLVGNGFAIIAADTSVHLSILVHKSNEKDIMILDSHKLMDGASGESGDRVQFTEYIQ  
KNVALYQFRNGIPLTAAAAANFTRGELATALRKSPYFVNILLAGYDKETGPSLYFIDYIATL  
HKVDKGAFGYGSYFALSMMDRHYHSGMSVEEAIDLVDKCIVEIRSRLVVAPPNFVIKIVDE  
KGAREYGWRESVKDTTFPRVS

>tr|A0A7C9CU14|A0A7C9CU14\_OPUST Cupin\_5 domain-containing protein OS=Opuntia  
streptacantha OX=393608 PE=4 SV=1

EREREREREREMVGTSQLVEKLNKKAHVEGGYFHETFRDHSITLSKSHLPPQYKVDRPVST  
AIYFLLPAGSVSKLHRIPMAETWHFYLGEPIMIVELNEKDASVKLTCLGPNLMENQQPQYT  
VPPNVWFGSFPTKDISISPNGVATKAEPDPETHFSLVGCTCAPAFQFEDFELAKRSELVSLF  
PNYESLISLLTSSD

>tr|A0A7C8ZZS4|A0A7C8ZZS4\_OPUST Uncharacterized protein OS=Opuntia  
streptacantha OX=393608 PE=3 SV=1

MFLVDWIFYGILASLGLWQKEAKILFLGLDNAGKTTLLHMLKDERLVQHQPQYPTSEELS  
IGKIKFKAFDLGGHQIARRVWKDYAKVDVYLVLDAYDKERFAESKKELDALLSDEAL  
ANVPFLILGNKIDIPYAASEEELRYHLGLTNFTTGKGVNLADSNVRPMEVFMCSIVKKM  
GYGEGFRWLSQYIK

>tr|A0A0K9R796|A0A0K9R796\_SPIOL GTP-binding nuclear protein OS=Spinacia oleracea  
OX=3562 GN=SOVF\_098770 PE=3 SV=1

MALPNQQTVDYPSFKLVLVGDGGTGKTTFVKRHLSGEFEKKYEPTIGVEVHPLDFHTNCG  
QIRFYCWDTAGQEKFGGLRDGYIYGQCAIIMFDVTARLTYKNVPTWHRDLRCVCENIPI  
VLCGNKVDVKNRQVKAKQVTFHRKKNLQYYEISAKSNYNFEKPFLYLARKLAGDQNLH  
FVESPALAPPEVQIDLAEQQRHEQELAVAAAQPLPDDDDDAFE

>tr|A0A803LTG6|A0A803LTG6\_CHEQI Uncharacterized protein OS=Chenopodium quinoa  
OX=63459 PE=3 SV=1

MRQCLIYDSPEADARLIGIEYIVSEDLFMTLPDAEKRLWHSHEYEVKSGVLFLPGVPGAM  
QRPDLAKVAQTYGKTIHFWQVDRGDNPLGLPQIMMALTRDGQLYTHLASDVEKKYNV  
NFEKERENRAYMKGLEHGIHPLANAEGKGLRTELREVDCHGGAGAHSTPRVVF

**>tr|I0CC94|I0CC94\_9CARY Thioredoxin-dependent peroxiredoxin OS=Tamarix hispida  
OX=189793 GN=Prx2 PE=2 SV=1**

MACAAPTSAAVLSPSSSNPRAAGKLAAASIAKPFAQTLTAQNSFSGLRSSSSLRHFPLPASS  
CRSSHSARRSFVVRAGELPLVGNEAPDFEAEAVFDQEFINVKLSDYRGKKYVILFFYPLDF  
TFVCPTEITAFSDRCAEFEKLNTEVLGVSVDSVFSHLAWVQTDRKSGGLGDLKYPLISDVT  
KSVSKAYNVLIPDQGIALRGLVIIDKEGIIQHSTINNLAIGRSVDETLRTLQALQYVQENPDE  
VCPAGWKPGEEKSMKPDPKLSKEYFAAI

**>tr|A0A7C8Z5R6|A0A7C8Z5R6\_OPUST Uncharacterized protein OS=Opuntia  
streptacantha OX=393608 PE=3 SV=1**

MFLVDWIFYGILASLGLWQKEAKILFLGLDNAGKTTLLHMLKDERLAQHQPQTQYPTSEELS  
IGRIKFKAFDLGGHQIARRVWKDYAQAQVDAVVYLVDAFDRERFAESKRELDALLSDESLA  
KVPFLILGNKIDIPYAASEEELRYALGLMNCTSGKGTVNLEGTNVRPLEVFMCSIVRKMGY  
GEGFKWMSQYIK
